# Supplementary material
Source: publisher figshare collection journal article supplement (https://springernature.figshare.com/ndownloader/files/22064190)
Supplement: Supplementary file [file 22064190]

## Additional file 3

**Table S3:** Quality assessment using the Quality Assessment Tool for Before-After (Pre-Post) Studies With No Control Group by the National Heart, Lung, and Blood Institute [31]

| First author, year           | 1. Was the study question or objective clearly stated? | 2. Were eligibility/selection criteria for the study population pre-specified and clearly described? | 3. Were the participants in the study representative of those who would be eligible for the test/service/intervention in the general or clinical population of interest? | 4. Were all eligible participants that met the pre-specified entry criteria enrolled? | 5. Was the sample size sufficiently large to provide confidence in the findings? | 6. Was the test/service/intervention clearly described and delivered consistently across the study population? | 7. Were the outcome measures pre-specified, clearly defined, valid, reliable, and assessed consistently across all study participants? | 8. Were the people assessing the outcomes blinded to the participants' exposures/interventions? | 9. Was the loss to follow-up after baseline 20% or less? Were those lost to follow-up accounted for in the analysis? | 10. Did the statistical methods examine changes in outcome measures from before to after the intervention? Were statistical tests done that provided p values for the pre-to-post changes? | 11. Were outcome measures of interest taken multiple times before the intervention and multiple times after the intervention (i.e., did they use an interrupted time-series design)? | 12. If the intervention was conducted at a group level (e.g., a whole hospital, a community, etc.) did the statistical analysis take into account the use of individual-level data to determine effects at the group level? | Total score (theoretical range: 0-12) |
|------------------------------|--------------------------------------------------------|------------------------------------------------------------------------------------------------------|--------------------------------------------------------------------------------------------------------------------------------------------------------------------------|---------------------------------------------------------------------------------------|----------------------------------------------------------------------------------|----------------------------------------------------------------------------------------------------------------|----------------------------------------------------------------------------------------------------------------------------------------|-------------------------------------------------------------------------------------------------|----------------------------------------------------------------------------------------------------------------------|--------------------------------------------------------------------------------------------------------------------------------------------------------------------------------------------|--------------------------------------------------------------------------------------------------------------------------------------------------------------------------------------|-----------------------------------------------------------------------------------------------------------------------------------------------------------------------------------------------------------------------------|---------------------------------------|
| Bull, 2011 [34]              | 1                                                      | 1                                                                                                    | 0                                                                                                                                                                        | 1                                                                                     | NR                                                                               | 0                                                                                                              | 1                                                                                                                                      | 0                                                                                               | NR                                                                                                                   | 0                                                                                                                                                                                          | 1                                                                                                                                                                                    | 1                                                                                                                                                                                                                           | 6                                     |
| Cameron, 2015 [35]           | 1                                                      | 1                                                                                                    | 0                                                                                                                                                                        | CD                                                                                    | NR                                                                               | 1                                                                                                              | 1                                                                                                                                      | NR                                                                                              | NR                                                                                                                   | 1                                                                                                                                                                                          | 0                                                                                                                                                                                    | 1                                                                                                                                                                                                                           | 6                                     |
| Cima, 2013 [36]              | 1                                                      | 1                                                                                                    | 0                                                                                                                                                                        | 1                                                                                     | NR                                                                               | 1                                                                                                              | 1                                                                                                                                      | NR                                                                                              | NR                                                                                                                   | 1                                                                                                                                                                                          | 1                                                                                                                                                                                    | 1                                                                                                                                                                                                                           | 8                                     |
| Connolly, 2016 [37]          | 1                                                      | 1                                                                                                    | 0                                                                                                                                                                        | 1                                                                                     | NR                                                                               | NR                                                                                                             | 1                                                                                                                                      | NR                                                                                              | NR                                                                                                                   | 1                                                                                                                                                                                          | 0                                                                                                                                                                                    | 1                                                                                                                                                                                                                           | 6                                     |
| Crolla, 2012 [38]            | 1                                                      | 1                                                                                                    | 0                                                                                                                                                                        | 1                                                                                     | 0                                                                                | 1                                                                                                              | 1                                                                                                                                      | NR                                                                                              | NR                                                                                                                   | 1                                                                                                                                                                                          | 0                                                                                                                                                                                    | 1                                                                                                                                                                                                                           | 7                                     |
| DeHaas, 2016 [39]            | 0                                                      | 1                                                                                                    | 0                                                                                                                                                                        | 1                                                                                     | NR                                                                               | NR                                                                                                             | 1                                                                                                                                      | NR                                                                                              | NR                                                                                                                   | 0                                                                                                                                                                                          | 0                                                                                                                                                                                    | 1                                                                                                                                                                                                                           | 4                                     |
| Elia-Guedea, 2017 [40]       | 1                                                      | 1                                                                                                    | 0                                                                                                                                                                        | 1                                                                                     | NR                                                                               | NR                                                                                                             | 1                                                                                                                                      | NR                                                                                              | NR                                                                                                                   | 1                                                                                                                                                                                          | 0                                                                                                                                                                                    | 1                                                                                                                                                                                                                           | 6                                     |
| Forbes, 2008 [41]            | 1                                                      | 1                                                                                                    | 0                                                                                                                                                                        | 1                                                                                     | 1                                                                                | 1                                                                                                              | 1                                                                                                                                      | 0                                                                                               | NR                                                                                                                   | 1                                                                                                                                                                                          | 0                                                                                                                                                                                    | 1                                                                                                                                                                                                                           | 8                                     |
| Frenette, 2016 [42]          | 1                                                      | 1                                                                                                    | 0                                                                                                                                                                        | 1                                                                                     | 1                                                                                | NR                                                                                                             | 1                                                                                                                                      | 0                                                                                               | NR                                                                                                                   | 1                                                                                                                                                                                          | 0                                                                                                                                                                                    | 1                                                                                                                                                                                                                           | 7                                     |
| Garcell, 2017 [43]           | 1                                                      | 1                                                                                                    | 0                                                                                                                                                                        | 1                                                                                     | NR                                                                               | 1                                                                                                              | 1                                                                                                                                      | NR                                                                                              | NR                                                                                                                   | 1                                                                                                                                                                                          | 0                                                                                                                                                                                    | 1                                                                                                                                                                                                                           | 7                                     |
| Geubbels, 2004 [44]          | 1                                                      | 1                                                                                                    | 1                                                                                                                                                                        | CD                                                                                    | NR                                                                               | NR                                                                                                             | 1                                                                                                                                      | NR                                                                                              | NR                                                                                                                   | 0                                                                                                                                                                                          | 0                                                                                                                                                                                    | 1                                                                                                                                                                                                                           | 5                                     |
| Grant, 2018 (Epub 2017) [45] | 1                                                      | 1                                                                                                    | 0                                                                                                                                                                        | 1                                                                                     | NR                                                                               | 1                                                                                                              | 1                                                                                                                                      | NR                                                                                              | NR                                                                                                                   | 1                                                                                                                                                                                          | 0                                                                                                                                                                                    | 1                                                                                                                                                                                                                           | 7                                     |
| Hechenbleikner, 2015 [46]    | 1                                                      | 1                                                                                                    | 0                                                                                                                                                                        | 1                                                                                     | NR                                                                               | 1                                                                                                              | 1                                                                                                                                      | NR                                                                                              | NR                                                                                                                   | 1                                                                                                                                                                                          | 1                                                                                                                                                                                    | 1                                                                                                                                                                                                                           | 8                                     |
| Hedrick, 2007 [47]           | 1                                                      | 1                                                                                                    | 0                                                                                                                                                                        | 1                                                                                     | NR                                                                               | 1                                                                                                              | 1                                                                                                                                      | NR                                                                                              | NR                                                                                                                   | 1                                                                                                                                                                                          | 0                                                                                                                                                                                    | 1                                                                                                                                                                                                                           | 7                                     |
| Hedrick, 2007 [48]           | 1                                                      | 1                                                                                                    | 0                                                                                                                                                                        | 1                                                                                     | NR                                                                               | 1                                                                                                              | 1                                                                                                                                      | NR                                                                                              | NR                                                                                                                   | 1                                                                                                                                                                                          | 0                                                                                                                                                                                    | 1                                                                                                                                                                                                                           | 7                                     |
| Hewitt, 2017 [49]            | 1                                                      | 1                                                                                                    | 0                                                                                                                                                                        | 1                                                                                     | NR                                                                               | NR                                                                                                             | 1                                                                                                                                      | NR                                                                                              | NR                                                                                                                   | 1                                                                                                                                                                                          | 1                                                                                                                                                                                    | 1                                                                                                                                                                                                                           | 7                                     |
| Kao, 2010 [50]               | 1                                                      | 1                                                                                                    | 1                                                                                                                                                                        | 1                                                                                     | NR                                                                               | 0                                                                                                              | 1                                                                                                                                      | NR                                                                                              | NR                                                                                                                   | 1                                                                                                                                                                                          | 0                                                                                                                                                                                    | 1                                                                                                                                                                                                                           | 7                                     |
| Keenan, 2014 [51]            | 1                                                      | 1                                                                                                    | 0                                                                                                                                                                        | 1                                                                                     | NR                                                                               | 1                                                                                                              | 1                                                                                                                                      | NR                                                                                              | NR                                                                                                                   | 1                                                                                                                                                                                          | 0                                                                                                                                                                                    | 1                                                                                                                                                                                                                           | 7                                     |
| Keenan, 2015 [52]            | 1                                                      | 1                                                                                                    | 0                                                                                                                                                                        | 1                                                                                     | NR                                                                               | 1                                                                                                              | 1                                                                                                                                      | NR                                                                                              | NR                                                                                                                   | 1                                                                                                                                                                                          | 0                                                                                                                                                                                    | 1                                                                                                                                                                                                                           | 7                                     |
| Kilan, 2017 [53]             | 1                                                      | 1                                                                                                    | 0                                                                                                                                                                        | 0                                                                                     | 0                                                                                | 1                                                                                                              | 1                                                                                                                                      | NR                                                                                              | NR                                                                                                                   | 1                                                                                                                                                                                          | 1                                                                                                                                                                                    | 1                                                                                                                                                                                                                           | 7                                     |
| Knox, 2016 [54]              | 1                                                      | 1                                                                                                    | 0                                                                                                                                                                        | 1                                                                                     | 1                                                                                | 0                                                                                                              | 1                                                                                                                                      | NR                                                                                              | 1                                                                                                                    | 1                                                                                                                                                                                          | 0                                                                                                                                                                                    | 1                                                                                                                                                                                                                           | 8                                     |
| Larochelle, 2011 [55]        | 1                                                      | 1                                                                                                    | 0                                                                                                                                                                        | 1                                                                                     | NR                                                                               | 1                                                                                                              | 1                                                                                                                                      | NR                                                                                              | NR                                                                                                                   | 1                                                                                                                                                                                          | 0                                                                                                                                                                                    | 1                                                                                                                                                                                                                           | 7                                     |
| Lavu, 2012 [56]              | 1                                                      | 1                                                                                                    | 0                                                                                                                                                                        | CD                                                                                    | NR                                                                               | 1                                                                                                              | 1                                                                                                                                      | NR                                                                                              | NR                                                                                                                   | 1                                                                                                                                                                                          | 0                                                                                                                                                                                    | 1                                                                                                                                                                                                                           | 6                                     |
| Liau, 2010 [57]              | 1                                                      | 1                                                                                                    | 0                                                                                                                                                                        | 1                                                                                     | 1                                                                                | 1                                                                                                              | 1                                                                                                                                      | NR                                                                                              | NR                                                                                                                   | 1                                                                                                                                                                                          | 0                                                                                                                                                                                    | 1                                                                                                                                                                                                                           | 8                                     |
| Losh, 2017 [58]              | 1                                                      | 1                                                                                                    | 0                                                                                                                                                                        | 1                                                                                     | NR                                                                               | 1                                                                                                              | 1                                                                                                                                      | NR                                                                                              | 1                                                                                                                    | 0                                                                                                                                                                                          | 0                                                                                                                                                                                    | 1                                                                                                                                                                                                                           | 7                                     |
| Lutfiyya, 2012 [59]          | 1                                                      | 1                                                                                                    | 0                                                                                                                                                                        | 1                                                                                     | 0                                                                                | NR                                                                                                             | 1                                                                                                                                      | NR                                                                                              | NR                                                                                                                   | 1                                                                                                                                                                                          | 1                                                                                                                                                                                    | 1                                                                                                                                                                                                                           | 7                                     |
| Mammo, 2016 [60]             | 1                                                      | 1                                                                                                    | 0                                                                                                                                                                        | 1                                                                                     | NR                                                                               | 1                                                                                                              | 1                                                                                                                                      | NR                                                                                              | NR                                                                                                                   | 1                                                                                                                                                                                          | 0                                                                                                                                                                                    | 1                                                                                                                                                                                                                           | 7                                     |
| Misteli, 2012 [61]           | 1                                                      | 1                                                                                                    | 0                                                                                                                                                                        | 1                                                                                     | 1                                                                                | 0                                                                                                              | 0                                                                                                                                      | NR                                                                                              | NR                                                                                                                   | 1                                                                                                                                                                                          | 0                                                                                                                                                                                    | 1                                                                                                                                                                                                                           | 6                                     |

| First author, year            | 1. Was the study question or objective clearly stated? | 2. Were eligibility/ selection criteria for the study population pre-specified and clearly described? | 3. Were the participants in the study representative of those who would be eligible for the test/service/ intervention in the general or clinical population of interest? | 4. Were all eligible participants that met the pre-specified entry criteria enrolled? | 5. Was the sample size sufficiently large to provide confidence in the findings? | 6. Was the test/service/ intervention clearly described and delivered consistently across the study population? | 7. Were the outcome measures pre-specified, clearly defined, valid, reliable, and assessed consistently across all study participants? | 8. Were the people assessing the outcomes blinded to the participants' exposures/ interventions? | 9. Was the loss to follow-up after baseline 20% or less? Were those lost to follow-up accounted for in the analysis? | 10. Did the statistical methods examine changes in outcome measures from before to after the intervention? Were statistical tests done that provided p values for the pre-to-post changes? | 11. Were outcome measures of interest taken multiple times before the intervention and multiple times after the intervention (i.e., did they use an interrupted time-series design)? | 12. If the intervention was conducted at a group level (e.g., a whole hospital, a community, etc.) did the statistical analysis take into account the use of individual-level data to determine effects at the group level? | Total score (theoretical range: 0-12)                                                  |
|-------------------------------|--------------------------------------------------------|-------------------------------------------------------------------------------------------------------|---------------------------------------------------------------------------------------------------------------------------------------------------------------------------|---------------------------------------------------------------------------------------|----------------------------------------------------------------------------------|-----------------------------------------------------------------------------------------------------------------|----------------------------------------------------------------------------------------------------------------------------------------|--------------------------------------------------------------------------------------------------|----------------------------------------------------------------------------------------------------------------------|--------------------------------------------------------------------------------------------------------------------------------------------------------------------------------------------|--------------------------------------------------------------------------------------------------------------------------------------------------------------------------------------|-----------------------------------------------------------------------------------------------------------------------------------------------------------------------------------------------------------------------------|----------------------------------------------------------------------------------------|
| Nordin, 2018 (Epub 2017) [62] | 1                                                      | 1                                                                                                     | 0                                                                                                                                                                         | 1                                                                                     | NR                                                                               | 1                                                                                                               | 1                                                                                                                                      | NR                                                                                               | 0                                                                                                                    | 1                                                                                                                                                                                          | 0                                                                                                                                                                                    | 1                                                                                                                                                                                                                           | 7                                                                                      |
| Pastor, 2010 [63]             | 1                                                      | 1                                                                                                     | 0                                                                                                                                                                         | 1                                                                                     | NR                                                                               | 1                                                                                                               | 1                                                                                                                                      | NR                                                                                               | NR                                                                                                                   | 1                                                                                                                                                                                          | 0                                                                                                                                                                                    | 1                                                                                                                                                                                                                           | 7                                                                                      |
| Pérez-Blanco, 2015 [64]       | 1                                                      | 1                                                                                                     | 0                                                                                                                                                                         | 1                                                                                     | NR                                                                               | 1                                                                                                               | 1                                                                                                                                      | NR                                                                                               | NR                                                                                                                   | 1                                                                                                                                                                                          | 0                                                                                                                                                                                    | 1                                                                                                                                                                                                                           | 7                                                                                      |
| Reames, 2015 [65]             | 1                                                      | 1                                                                                                     | 1                                                                                                                                                                         | 1                                                                                     | 1                                                                                | NR                                                                                                              | 1                                                                                                                                      | NR                                                                                               | NR                                                                                                                   | 1                                                                                                                                                                                          | 0                                                                                                                                                                                    | 1                                                                                                                                                                                                                           | 8                                                                                      |
| Tanner, 2016 [66]             | 1                                                      | 1                                                                                                     | 1                                                                                                                                                                         | 1                                                                                     | NR                                                                               | 1                                                                                                               | 1                                                                                                                                      | 0                                                                                                | 1                                                                                                                    | 1                                                                                                                                                                                          | 0                                                                                                                                                                                    | 1                                                                                                                                                                                                                           | 9                                                                                      |
| Tillman, 2013 [67]            | 1                                                      | 1                                                                                                     | 0                                                                                                                                                                         | CD                                                                                    | 1                                                                                | 1                                                                                                               | 1                                                                                                                                      | NR                                                                                               | NR                                                                                                                   | 1                                                                                                                                                                                          | 0                                                                                                                                                                                    | 1                                                                                                                                                                                                                           | 7                                                                                      |
| Vogel, 2010 [68]              | 1                                                      | 1                                                                                                     | 0                                                                                                                                                                         | 1                                                                                     | NR                                                                               | 1                                                                                                               | 1                                                                                                                                      | NR                                                                                               | NR                                                                                                                   | 1                                                                                                                                                                                          | 0                                                                                                                                                                                    | 1                                                                                                                                                                                                                           | 7                                                                                      |
| Vu, 2018 (Epub 2017) [69]     | 1                                                      | 1                                                                                                     | 1                                                                                                                                                                         | 1                                                                                     | 1                                                                                | NR                                                                                                              | 1                                                                                                                                      | NR                                                                                               | 1                                                                                                                    | 1                                                                                                                                                                                          | 0                                                                                                                                                                                    | 1                                                                                                                                                                                                                           | 9                                                                                      |
| Waters, 2017 [70]             | 1                                                      | 1                                                                                                     | 0                                                                                                                                                                         | 1                                                                                     | 1                                                                                | 1                                                                                                               | 1                                                                                                                                      | NR                                                                                               | NR                                                                                                                   | 1                                                                                                                                                                                          | 0                                                                                                                                                                                    | 1                                                                                                                                                                                                                           | 8                                                                                      |
| Wick, 2012 [71]               | 1                                                      | 1                                                                                                     | 0                                                                                                                                                                         | 1                                                                                     | NR                                                                               | 1                                                                                                               | 1                                                                                                                                      | NR                                                                                               | NR                                                                                                                   | 1                                                                                                                                                                                          | 1                                                                                                                                                                                    | 1                                                                                                                                                                                                                           | 8                                                                                      |
| Wick, 2015 [72]               | 1                                                      | 1                                                                                                     | 0                                                                                                                                                                         | 1                                                                                     | NR                                                                               | NR                                                                                                              | 1                                                                                                                                      | NR                                                                                               | NR                                                                                                                   | 1                                                                                                                                                                                          | 0                                                                                                                                                                                    | 1                                                                                                                                                                                                                           | 6                                                                                      |
| Willis, 2016 [73]             | 1                                                      | 1                                                                                                     | 0                                                                                                                                                                         | 1                                                                                     | 0                                                                                | 1                                                                                                               | 1                                                                                                                                      | NR                                                                                               | NR                                                                                                                   | 1                                                                                                                                                                                          | 0                                                                                                                                                                                    | 1                                                                                                                                                                                                                           | 7                                                                                      |
| <b>Total</b>                  | 39                                                     | 40                                                                                                    | 5                                                                                                                                                                         | 35                                                                                    | 9                                                                                | 26                                                                                                              | 39                                                                                                                                     | 0                                                                                                | 4                                                                                                                    | 36                                                                                                                                                                                         | 7                                                                                                                                                                                    | 40                                                                                                                                                                                                                          | Mean: 7<br>SD: 0.96,<br>95%-<br>confidence<br>interval:<br>[6.7   7.3].<br>range: 4-9) |

Notes: Yes = 1; No = 0; CD = cannot determine; NA = not applicable; NR = not reported
